# Supplementary material for: Prevalence and factors associated with suicidal ideation, cannabis, and alcohol use during the COVID-19 pandemic in Saskatchewan: findings from a joint-effect modeling
Source: BMC Psychiatry. 2023 Aug 8;23:571. doi: 10.1186/s12888-023-05051-w (PMC10408153; doi:10.1186/s12888-023-05051-w)
Supplement: Supplementary file 2 — Additional file 2: Table S1. Prevalence of suicidal ideation, and problematic cannabis and alcohol use. Tables S2. Prevalence of suicidal ideation, problematic cannabis and alcohol use, Canada and Saskatchewan province [file 12888_2023_5051_MOESM2_ESM.docx]

**Supplementary Table**

**Prevalence and factors associated with suicidal ideation, cannabis, and alcohol use during the COVID-19 pandemic in Saskatchewan: findings from a joint-effect modeling**

*Running title: Suicidal ideation, cannabis, and alcohol use in Saskatchewan*

Daniel A. Adeyinka1,2, Nuelle Novik1,3, Gabriela Novotna1,3, Mary Bartram4,5, Robert Gabrys6, Nazeem Muhajarine1,2

**Affiliations and Addresses:**

1Saskatchewan Population Health and Evaluation Research Unit (SPHERU), University of Saskatchewan, 104 Clinic Place, Saskatoon, SK, S7N 2Z4

2Department of Community Health and Epidemiology, College of Medicine, University of Saskatchewan, 107 Wiggins Rd, Saskatoon, SK, S7N 5E5

3Faculty of Social Work, University of Regina, 3737 Wascana Parkway, Regina, SK, S4S 0A2

4School of Public Health and Administration, Carleton University, Ottawa, ON, K1S 5B6

5Mental Health Commission of Canada, Ottawa ON, K1R 1A4

6Canadian Centre on Substance Use and Addiction, Ottawa, ON, K1P 5E7

**Corresponding Author: Nazeem Muhajarine, e: nazeem.muhajarine@usask.ca**

Table S1. Prevalence of suicidal ideation, and problematic cannabis and alcohol use

| **Variables** | **Overall** | **Suicidal ideation** | | **Problematic cannabis use** | | **Problematic alcohol use** | |
| --- | --- | --- | --- | --- | --- | --- | --- |
|  | n (%) | *No (n,%)* | *Yes (n,%)* | *No (n,%)* | *Yes (n,%)* | *No (n,%)* | *Yes (n,%)* |
| **Sociodemographic** | | | | | | | |
| *Age (years) (n=666)* | | | | | | | |
| 16-34 | 86 (12.91) | 71 (82.56) | 15 (17.44) | 67 (77.91) | 19 (22.09) | 61 (70.93) | 25 (29.07) |
| 35-54 | 189 (28.38) | 173 (91.53) | 16 (8.47) | 174 (92.06) | 15 (7.94) | 157 (83.07) | 32 (16.93) |
| ≥55 | 391 (58.71) | 381 (97.44) | 10 (2.56) | 377 (96.42) | 14 (3.58) | 362 (92.58) | 29 (7.42) |
| P-value |  | <0.001 | | <0.001 | | <0.001 | |
| *Gender (n=663)* | | | | | | | |
| Woman | 378 (57.01) | 349 (92.33) | 29 (7.67) | 357 (94.44) | 21 (5.56) | 331 (87.57) | 47 (12.43) |
| Man | 285 (42.99) | 273 (95.79) | 12 (4.21) | 259 (90.88) | 26 (9.12) | 247 (86.67) | 38 (13.33) |
| P-value |  | 0.067 | | 0.076 | | 0.732 | |
| *Highest education (n=663)* | | | | | | | |
| High school or less | 191 (28.81) | 180 (94.24) | 11 (5.79) | 177 (92.67) | 14 (7.33) | 166 (86.91) | 25 (13.09) |
| College | 254 (38.31) | 236 (92.91) | 18 (7.09) | 239 (94.09) | 15 (5.91) | 226 (88.98) | 28 (11.02) |
| University | 218 (32.88) | 206 (94.5) | 12 (5.5) | 199 (91.28) | 19 (8.72) | 185 (84.86) | 33 (15.14) |
| P-value |  | 0.745 | | 0.501 | | 0.414 | |
| *Household income (n=585)* | | | | | | | |
| ≤ $20k | 37 (6.32) | 33 (89.19) | 4 (10.81) | 32 (86.49) | 5 (13.51) | 31 (83.78) | 6 (16.22) |
| $21k-$50k | 166 (28.38) | 152 (91.57) | 14 (8.43) | 151 (90.96) | 15 (9.04) | 144 (86.75) | 22 (13.25) |
| $51k-$100k | 235 (40.17) | 224 (95.32) | 11 (4.68) | 222 (94.47) | 13 (5.53) | 203 (86.38) | 32 (13.62) |
| >$100k | 147 (25.13) | 138 (93.88) | 9 (6.12) | 136 (92.52) | 11 (7.48) | 127 (86.39) | 20 (13.61) |
| P-value |  | 0.268* | | 0.26* | | 0.973 | |
| *Ethnicity (n=654)* | | | | | | | |
| White | 580 (88.69) | 550 (94.83) | 30 (5.17) | 547 (94.31) | 33 (5.69) | 516 (88.97) | 64 (11.03) |
| BIPOC | 74 (11.31) | 63 (85.14) | 11 (14.86) | 59 (79.73) | 15 (20.27) | 52 (70.27) | 22 (29.73) |
| P-value |  | 0.004 | | <0.001 | | <0.001 | |
| *LGBTQIA2S+ (n=659)* | | | | | | | |
| No | 624 (94.69) | 590 (94.55) | 34 (5.45) | 585 (93.75) | 39 (6.25) | 552 (88.46) | 72 (11.54) |
| Yes | 35 (5.31) | 29 (82.86) | 6 (17.14) | 26 (74.29) | 9 (25.71) | 23 (65.71) | 12 (34.29) |
| P-value |  | 0.015* | | <0.001* | | 0.001* | |
| *Household composition (n=664)* | | | | | | | |
| Living alone | 174 (26.2) | 163 (93.68) | 11 (6.32) | 156 (89.66) | 18 (10.34) | 145 (83.33) | 29 (16.67) |
| Living with others | 490 (73.8) | 460 (93.88) | 30 (6.12) | 460 (93.88) | 30 (6.12) | 433 (88.37) | 57 (11.63) |
| P-value |  | 0.925 | | 0.065 | | 0.089 | |
| *Migration status (n=664)* | | | | | | | |
| Canadian-born | 595 (89.61) | 560 (94.12) | 35 (5.88) | 554 (93.11) | 41 (6.89) | 523 (87.90) | 72 (12.1) |
| Immigrants | 69 (10.39) | 64 (92.75) | 5 (7.25) | 63 (91.3) | 6 (6.87) | 56 (81.16) | 13 (18.84) |
| P-value |  | 0.595* | | 0.617* | | 0.1133 | |
| *Place of residence (n=514)* | | | | | | | |
| Regina | 177 (34.44) | 168 (94.92) | 9 (5.08) | 166 (93.79) | 11 (6.21) | 160 (90.4) | 17 (9.6) |
| Saskatoon | 197 (38.33) | 187 (94.92) | 10 (5.08) | 180 (91.37) | 17 (8.63) | 170 (86.29) | 27 (13.71) |
| North | 46 (8.95) | 40 (86.96) | 6 (13.04) | 44 (95.65) | 2 (4.35) | 39 (84.78) | 7 (15.22) |
| Central | 36 (7) | 35 (97.22) | 1 (2.78) | 35 (97.22) | 1 (2.78) | 31 (86.11) | 5 (13.89) |
| South | 58 (11.28) | 56 (96.55) | 2 (3.45) | 56 (96.55) | 2 (3.45) | 52 (89.66) | 6 (10.34) |
| P-value |  | 0.275* | | 0.604* | | 0.651* | |
| **Mental health status** | | | | | | | |
| *Mental health disorder (n=658)* | | | | | | | |
| No | 494 (75.08) | 479 (96.96) | 15 (3.04) | 469 (94.94) | 25 (5.06) | 437 (88.46) | 57 (11.54) |
| Before pandemic | 140 (21.28) | 123 (87.86) | 17 (12.14) | 126 (90) | 14 (10) | 122 (87.14) | 18 (12.86) |
| During pandemic | 24 (3.65) | 16 (66.67) | 8 (33.33) | 16 (66.67) | 8 (33.3) | 16 (66.67) | 8 (33.33) |
| P-value |  | <0.001* | | <0.001* | | 0.015* | |
| *Pandemic stress (n=644)* | | | | | | | |
| No | 108 (16.77) | 106 (98.15) | 2 (1.85) | 107 (99.07) | 1 (0.93) | 103 (95.37) | 5 (4.63) |
| Yes | 536 (83.23) | 497 (92.72) | 39 (7.28) | 490 (91.42) | 46 (8.58) | 457 (85.26) | 79 (14.74) |
| P-value |  | 0.035 | | 0.005 | | 0.004 | |
| **Adaptability** | | | | | | | |
| *Resilience (n=665)* | | | | | | | |
| Low (1-2.99) | 162 (24.36) | 134 (82.72) | 28 (17.28) | 151 (93.21) | 11 (6.79) | 128 (79.01) | 34 (20.99) |
| Normal to high (3-5) | 503 (75.64) | 490 (97.42) | 13 (2.58) | 466 (92.64) | 37 (7.36) | 451 (89.66) | 52 (10.34) |
| P-value |  | <0.001 | | 0.809 | | <0.001 | |
| *Recent changes in other substance use (median, n=598)* | | | | | | | |
| Low (-0.69 to -0.36) | 300 (50.17) | 293 (97.67) | 7 (2.33) | 296 (98.67) | 4 (1.33) | 283 (94.33) | 17 (5.67) |
| High (-0.36 to 3.86) | 298 (49.83) | 266 (89.26) | 32 (10.72) | 258 (86.58) | 40 (13.42) | 236 (79.19) | 62 (20.81) |
| P-value |  | 0.001 | | <0.001 | | <0.001 | |
| *Changes in alternative activities (median, n=598)* | | | | | | | |
| Low (-2.31 to 0.09) | 299 (50) | 273 (91.30) | 26 (8.70) | 283 (94.65) | 16 (5.35) | 260 (86.96) | 39 (13.04) |
| High (0.09 to 2.06) | 299 (50) | 286 (95.65) | 13 (4.35) | 271 (90.64) | 28 (9.36) | 259 (86.62) | 40 (13.38) |
| P-value |  | 0.031 | | 0.06 | | 0.904 | |
| **Access to formal treatment services** | | | | | | | |
| *Mental health services (n=642)* | | | | | | | |
| Not needed and not accessed | 479 (74.61) | 466 (97.29) | 13 (2.71) | 459 (95.82) | 20 (4.18) | 428 (89.35) | 51 (10.65) |
| Needed but not accessed | 111 (17.29) | 100 (90.09) | 11 (9.91) | 100 (90.09) | 11 (9.91) | 99 (89.19) | 12 (10.81) |
| Needed and accessed | 52 (8.1) | 38 (73.08) | 14 (26.92) | 42 (80.77) | 10 (19.23) | 38 (73.08) | 14 (26.92) |
| P-value |  | <0.001* | | <0.001* | | 0.003 | |
| *Cannabis addiction services (n=662)* | | | | | | | |
| Not applicable | 171 (25.83) | 166 (97.08) | 5 (2.92) | 168 (98.25) | 3 (1.75) | 150 (87.72) | 21 (12.28) |
| No | 479 (72.36) | 447 (93.32) | 32 (6.68) | 443 (92.48) | 36 (7.52) | 424 (88.52) | 55 (11.48) |
| Yes | 12 (1.81) | 8 (66.67) | 4 (33.33) | 3 (25) | 9 (75) | 3 (25) | 9 (75) |
| P-value |  | 0.001* | | <0.001* | | <0.001* | |
| *Alcohol addiction services (n=662)* | | | | | | | |
| Not applicable | 80 (12.08) | 79 (98.75) | 1 (1.25) | 79 (98.75) | 1 (1.25) | 77 (96.25) | 3 (3.75) |
| No | 565 (85.35) | 530 (93.81) | 35 (6.19) | 530 (93.81) | 35 (6.19) | 498 (88.14) | 67 (11.86) |
| Yes | 17 (2.57) | 13 (76.47) | 4 (23.53) | 6 (35.29) | 11 (64.71) | 2 (11.76) | 15 (88.24) |
| P-value |  | 0.006* | | <0.001* | | <0.001* | |

**Fisher's exact test, otherwise Chi-square test*

Tables S2: Prevalence of suicidal ideation, problematic cannabis and alcohol use, Canada and Saskatchewan province

| Prevalence (%) | Canada | Saskatchewan |
| --- | --- | --- |
| Suicidal ideation | 8.11 | 6.16 |
| Problematic alcohol use | 14.09 | 12.91 |
| Problematic cannabis use | 7.96 | 7.21 |
